# Supplementary material
Source: PubMed Central journal article supplement (PMC1750887)

$\alpha$ Lyz

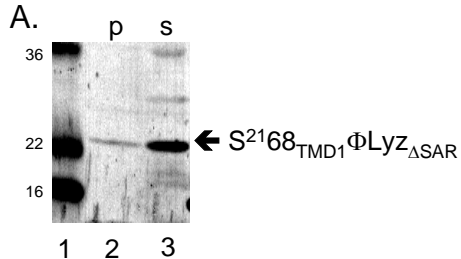

$\alpha$ PhoA

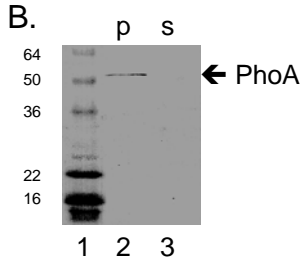

$\alpha$ R<sup>λ</sup>

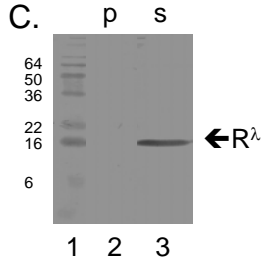

Supplement: pnas_0600943103_1.pdf [file pnas_0600943103_1.pdf]

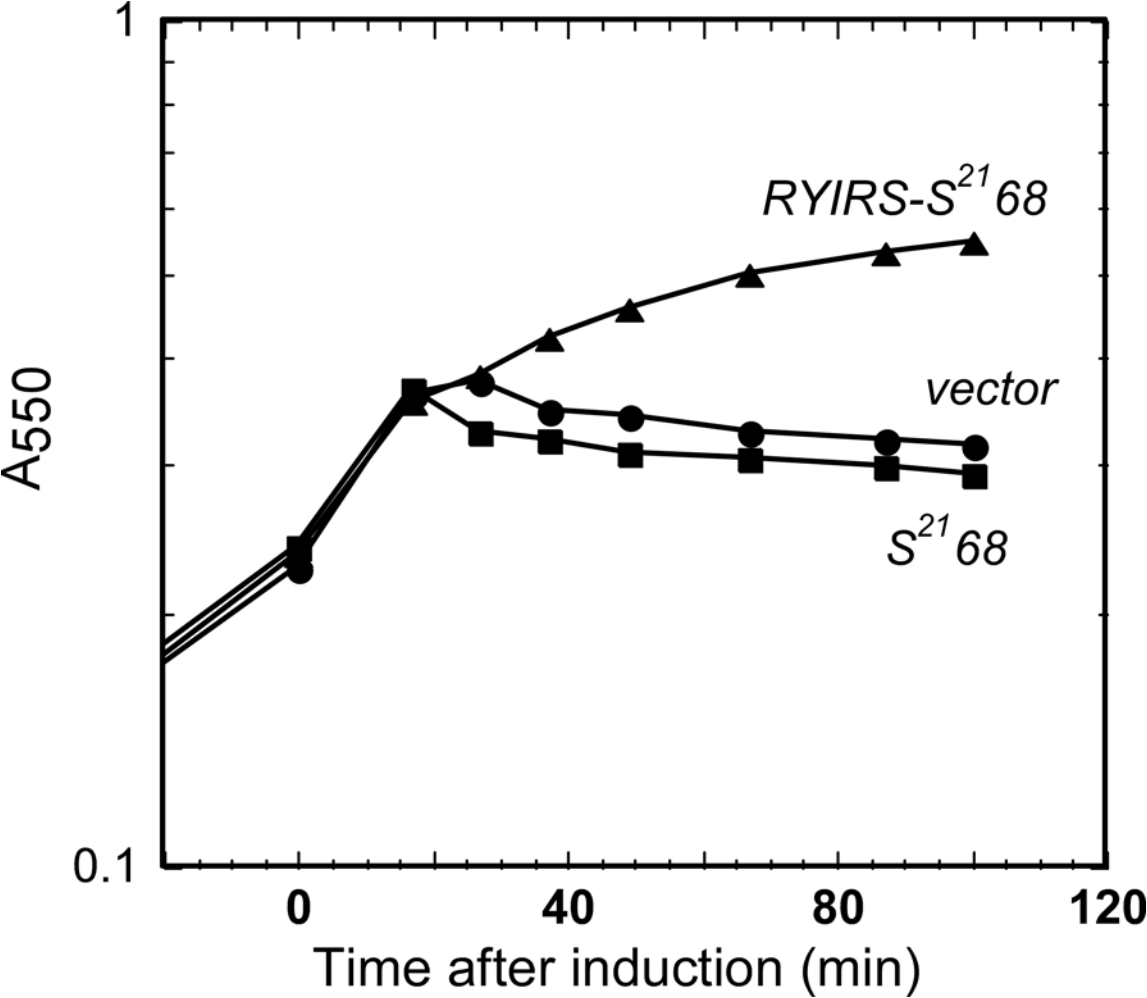

Supplement: pnas_0600943103_4.pdf [file pnas_0600943103_4.pdf]
